# Supplementary material for: AIEE compounds based on 9,10-dithienylanthracene-substituted triphenylamine: design, synthesis, and applications in cell imaging
Source: Royal Society of Chemistry journal article supplement (doi:10.1039/d2nj01126c), 2022-01-01
Supplement: d2nj01126c1.pdf [file d2nj01126c1.pdf]

## †Electronic Supporting Information

for

### **AIEE compounds based on 9, 10-dithienylanthracene-substituted triphenylamine: design, synthesis, and applications in cell imaging**

Yuanfang Zhou <sup>a</sup>, Huanhuan Fan <sup>a</sup>, Yanqun Mu <sup>a</sup>, Renjie Wang <sup>a,\*</sup>, Qiwei Ren <sup>c</sup>, Shouzhi Pu <sup>a,b,\*\*</sup>

<sup>a</sup> *Jiangxi Key Laboratory of Organic Chemistry, Jiangxi Science and Technology Normal*

*University, Nanchang, 330013, PR China*

<sup>b</sup> *Department of Ecology and Environment, Yuzhang Normal University, Nanchang 330103, PR*

*China*

<sup>c</sup> *Xinyu Pharmaceutical Co.,Ltd., Suzhou 234000, P. R. China*

\***Corresponding author 1:** E-mail address: bio-wrj@163.com

\***Corresponding author 2:** E-mail address: pushouzhi@tsinghua.org.cn

#### **Figure of Contents**

**Figure S1.** NMR spectra data for **TPA-DTA-C** in DMSO-*d*<sub>6</sub>: (A) <sup>1</sup>H-NMR spectrum; (B) <sup>13</sup>C-NMR spectrum.

**Figure S2.** NMR spectra data for **TPA-DTA-PAM** in DMSO-*d*<sub>6</sub>: (A) <sup>1</sup>H-NMR spectrum; (B) <sup>13</sup>C-NMR spectrum.

**Figure S3.** NMR spectra data for **TPA-DTA-PA** in DMSO-*d*<sub>6</sub>: (A) <sup>1</sup>H-NMR spectrum; (B) <sup>13</sup>C-NMR spectrum.

**Figure S4.** NMR spectra data for **TPA-DTA-PATF** in DMSO-*d*<sub>6</sub>: (A) <sup>1</sup>H-NMR spectrum; (B) <sup>13</sup>C-NMR spectrum.

**Figure S5.** HRMS-ESI spectra of **TPA-DTA-C** in acetonitrile.

**Figure S6.** HRMS-ESI spectra of **TPA-DTA-PAM** in acetonitrile.

**Figure S7.** HRMS-ESI spectra of **TPA-DTA-PA** in acetonitrile.

**Figure S8.** HRMS-ESI spectra of **TPA-DTA-PATF** in acetonitrile.

**Figure S9.** The changes of absorption, fluorescence spectra and photos in THF/H<sub>2</sub>O with different fraction for **TPA-DTA-C** (A), **TPA-DTA-PA** (B), and **TPA-DTA-PATF** ( $\lambda_{\text{ex}} = 400 \text{ nm}$ ,  $C = 2.0 \times 10^{-5} \text{ mol/L}$ ).

**Figure S10.** Size distribution curve of **TPA-DTA-C** (A), **TPA-DTA-PA** (B) **TPA-DTA-PATF** (C) in THF-H<sub>2</sub>O ( $f_w = 90\%$ ) mixture ( $C = 2.0 \times 10^{-5} \text{ mol/L}$ ).

**Figure S11.** SEM images of **TPA-DTA-C** (A), **TPA-DTA-PA** (B) and **TPA-DTA-PATF** (C) in THF/H<sub>2</sub>O ( $f_w = 90\%$ )...

**Figure S12.** Photographic images of **TPA-DTA-C** in various states under 365 nm UV irradiation.

**Figure S13.** (A) Solid state PL spectra of **TPA-DTA-PA** before and after the grinding, and after treatment with DCM vapor. (B) XRD curves of **TPA-DTA-PA** in pristine, ground, and fumed form, (C-E) Photographic images of **TPA-DTA-PA** in various states under 365 nm UV irradiation.

**Figure S14.** (A) Solid state PL spectra of **TPA-DTA-PATF** before and after the grinding, and after treatment with DCM vapor. (B) XRD curves of **TPA-DTA-PATF** in pristine, ground, and fumed form, (C-E) Photographic images of **TPA-DTA-PATF** in various states under 365 nm UV irradiation.

**Figure S15.** % cell viability of HeLa cells treated with different concentrations (10→50  $\mu\text{M}$ ) of **TPA-DTA-PAM** (A), **TPA-DTA-PA** (B), and **TPA-DTA-PATF** (C) for 24 h determined by MTT assay.

## **Table of Contents**

**Table S1.** Total energies of **TPA-DTA-C**.

**Table S2.** Symbolic Z-Matrix of **TPA-DTA-C**.

**Table S3.** Total energies of **TPA-DTA-PAM**.

**Table S4.** Symbolic Z-Matrix of **TPA-DTA-PAM**.

**Table S5.** Total energies of **TPA-DTA-PA**.

**Table S6.** Symbolic Z-Matrix of **TPA-DTA-PA**.

**Table S7.** Total energies of **TPA-DTA-PATF**

**Table S8.** Symbolic Z-Matrix of **TPA-DTA-PATF**.

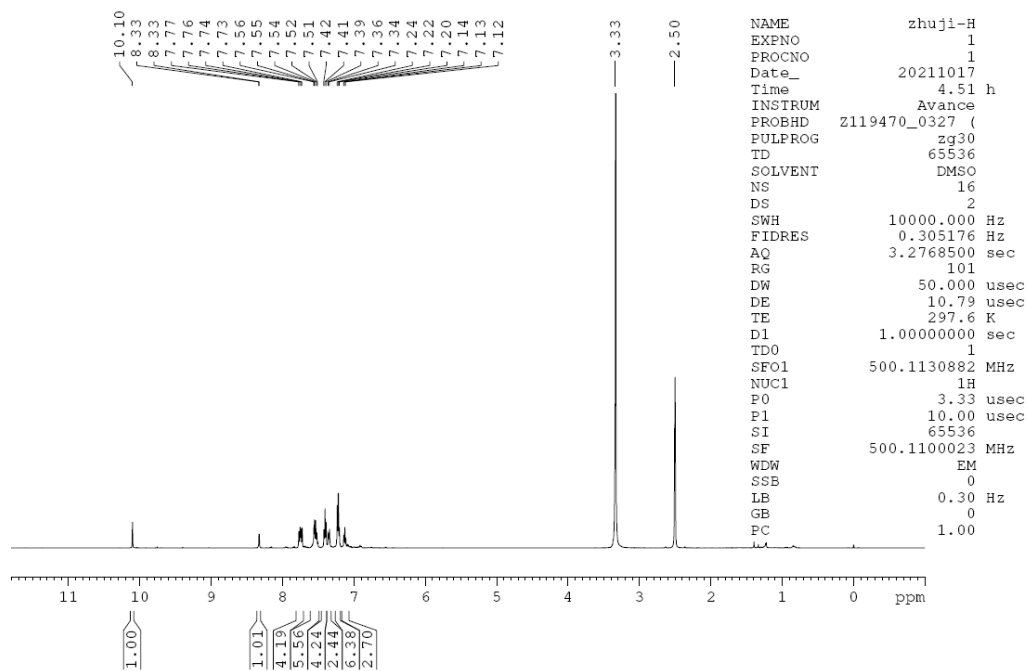

(A)

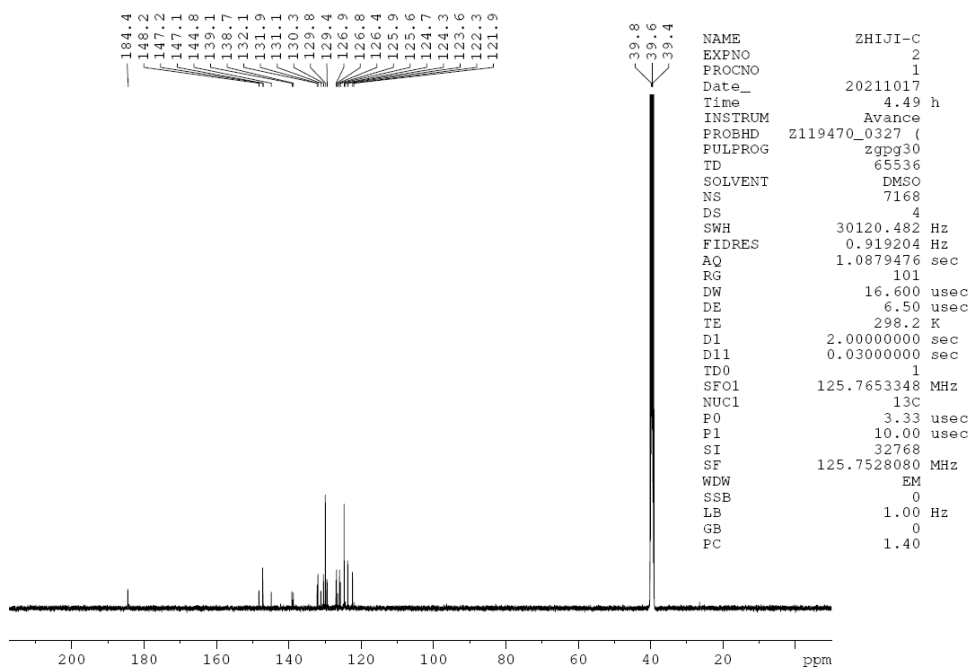

(B)

**Figure S1.** NMR spectra data for TPA-DTA-C in DMSO- $d_6$ : (A)  $^1\text{H}$ -NMR spectra; (B)  $^{13}\text{C}$ -NMR spectra.

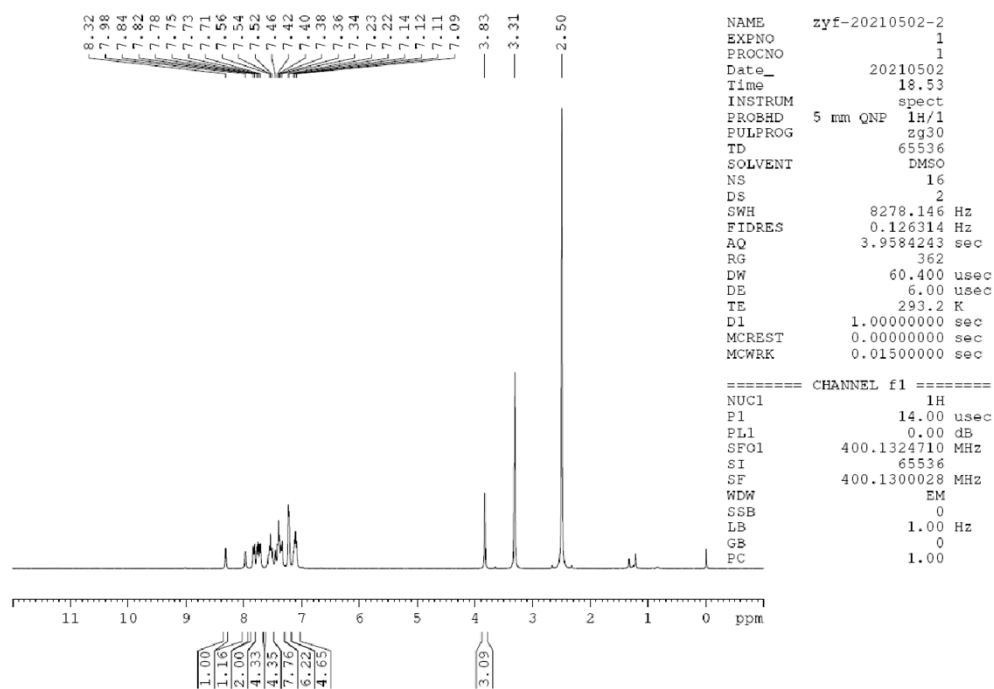

(A)

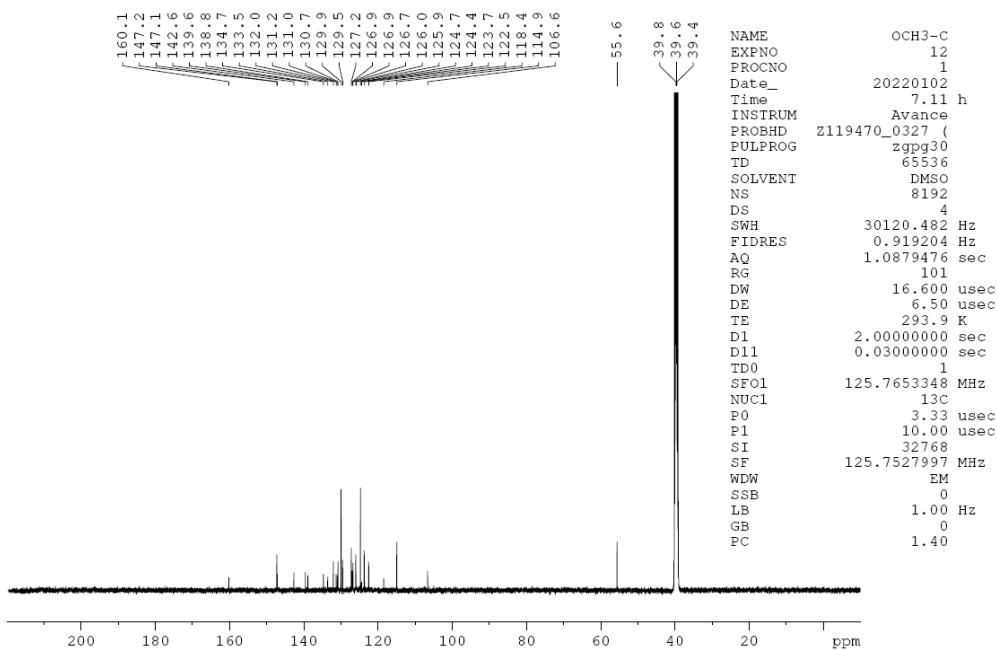

(B)

Figure S2. NMR spectra data for TPA-DTA-PAM in DMSO- $d_6$ : (A)  $^1\text{H}$ -NMR spectra; (B)  $^{13}\text{C}$ -NMR spectra.

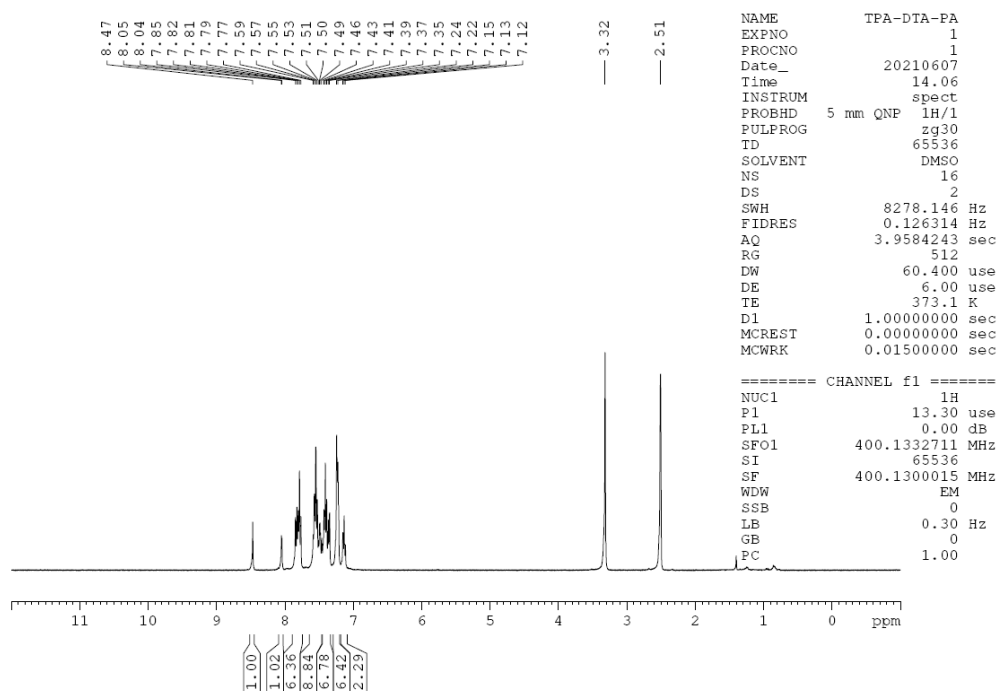

(A)

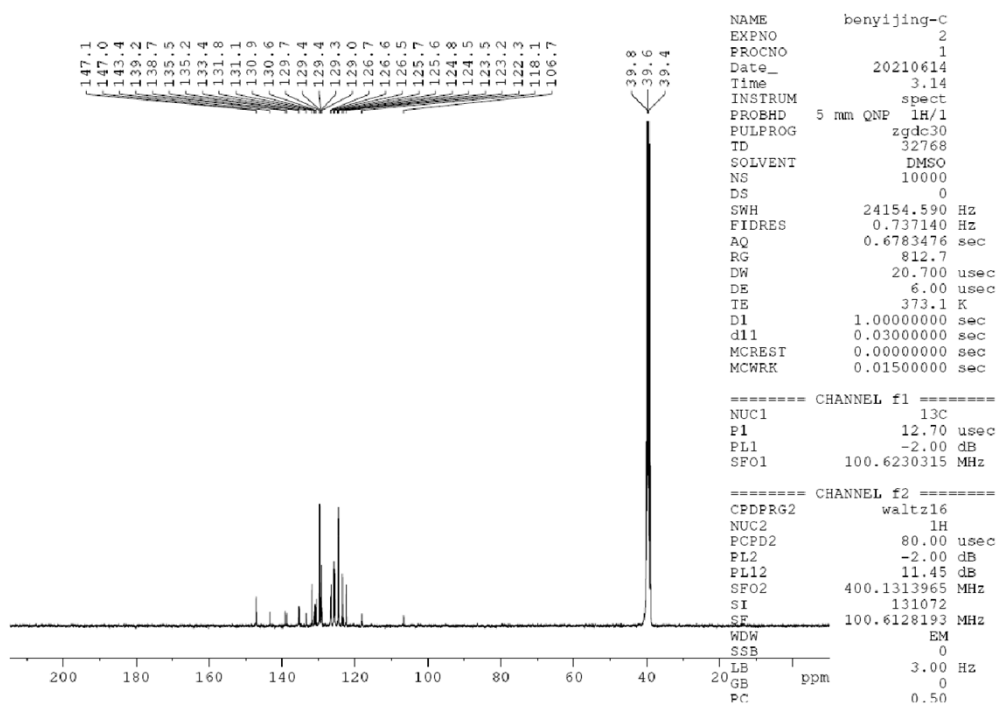

(B)

Figure S3. NMR spectra data for TPA-DTA-PA in DMSO- $d_6$ : (A)  $^1\text{H}$ -NMR spectra; (B)  $^{13}\text{C}$ -NMR spectra.

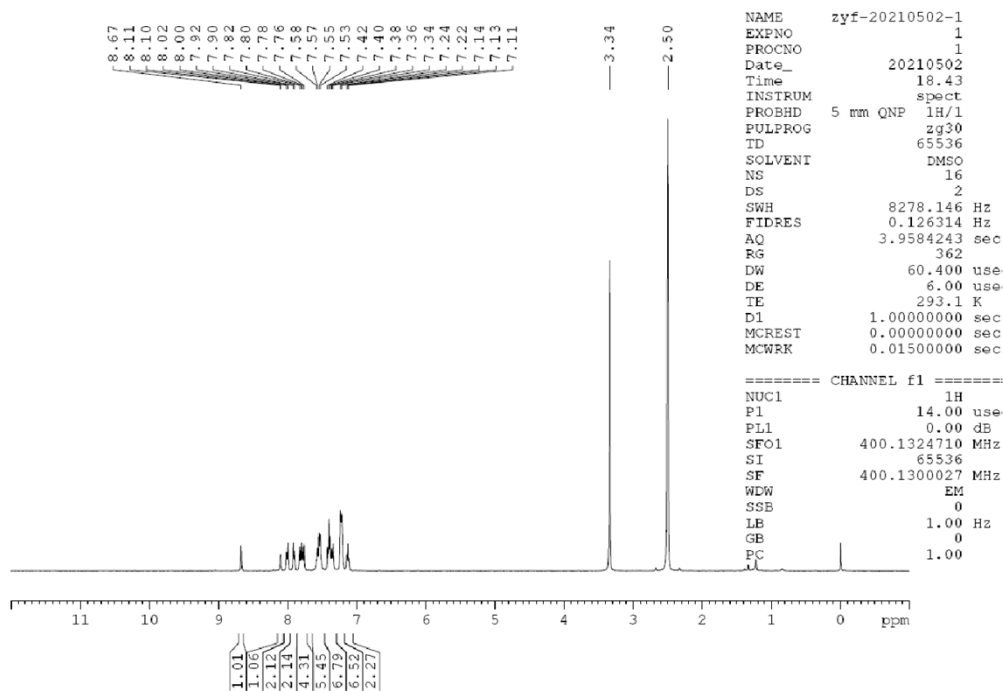

(A)

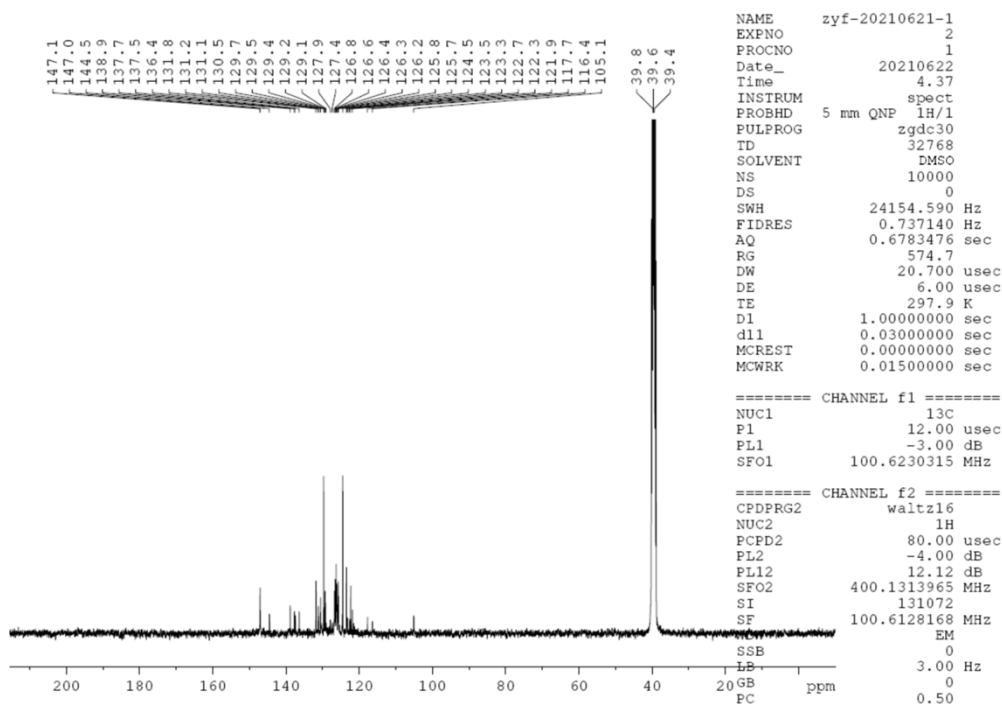

(B)

Figure S4. NMR spectra data for TPA-DTA-PATF in DMSO- $d_6$ : (A)  $^1\text{H}$ -NMR spectra; (B)  $^{13}\text{C}$ -NMR spectra.

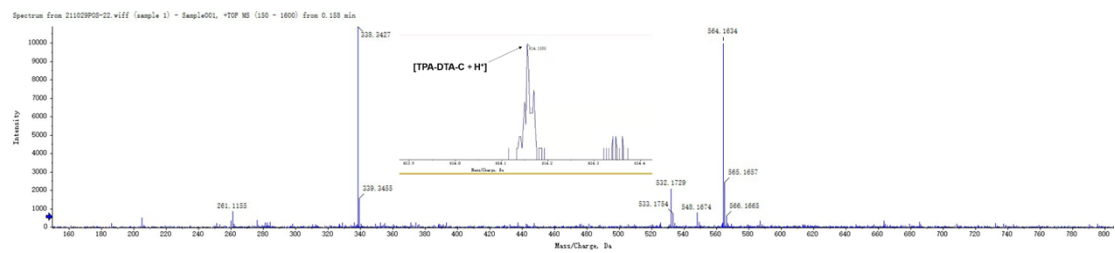

**Figure S5.** HRMS-ESI spectra of TPA-DTA-C.



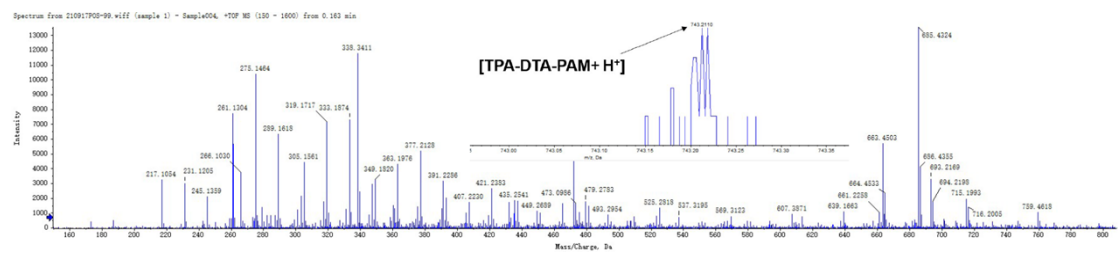

**Figure S6.** HRMS-ESI spectra of TPA-DTA-PAM.

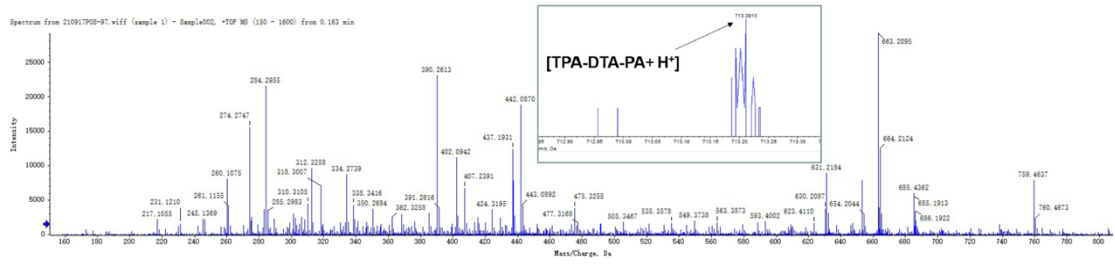

**Figure S7.** HRMS-ESI spectra of TPA-DTA-PA.

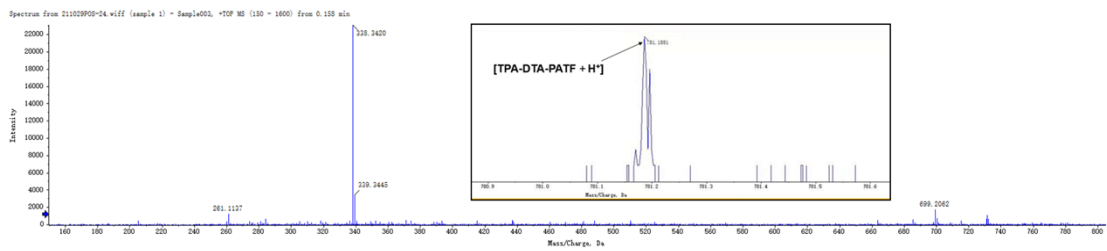

**Figure S8.** HRMS-ESI spectra of TPA-DTA-PATF.

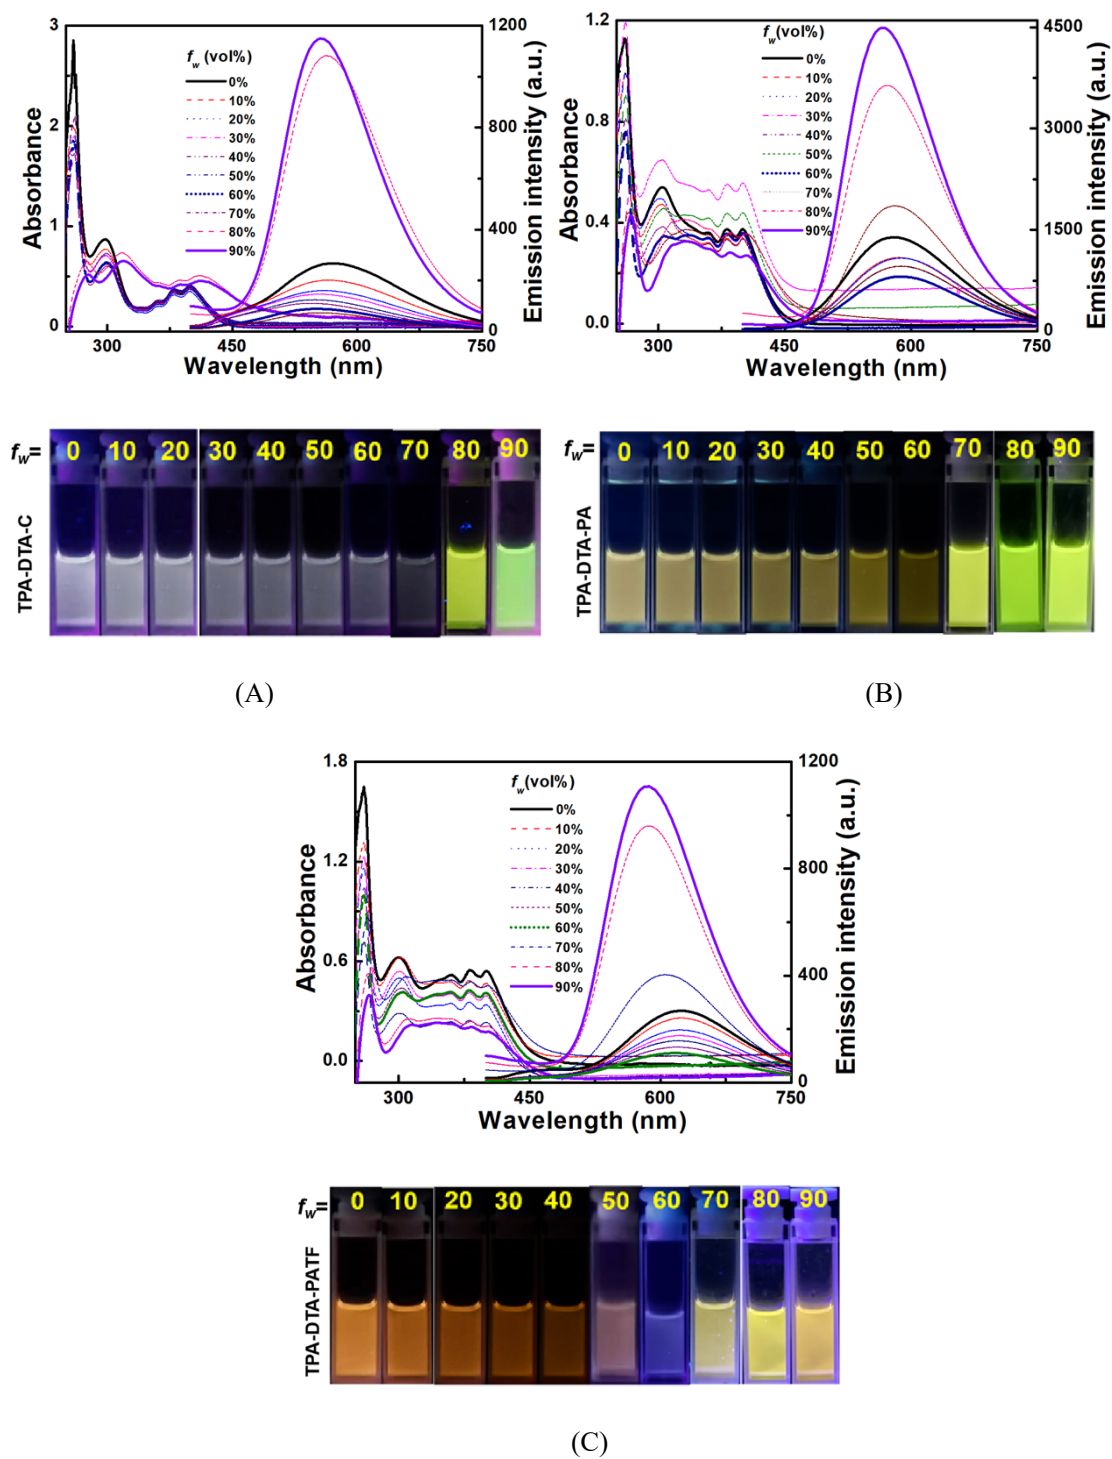

**Figure S9.** The changes of absorption, fluorescence spectra and photos in THF/H<sub>2</sub>O with different fraction for TPA-DTA-C (A), TPA-DTA-PA (B), and TPA-DTA-PATF ( $\lambda_{\text{ex}} = 400 \text{ nm}$ ,  $C = 2.0 \times 10^{-5} \text{ mol/L}$ ).

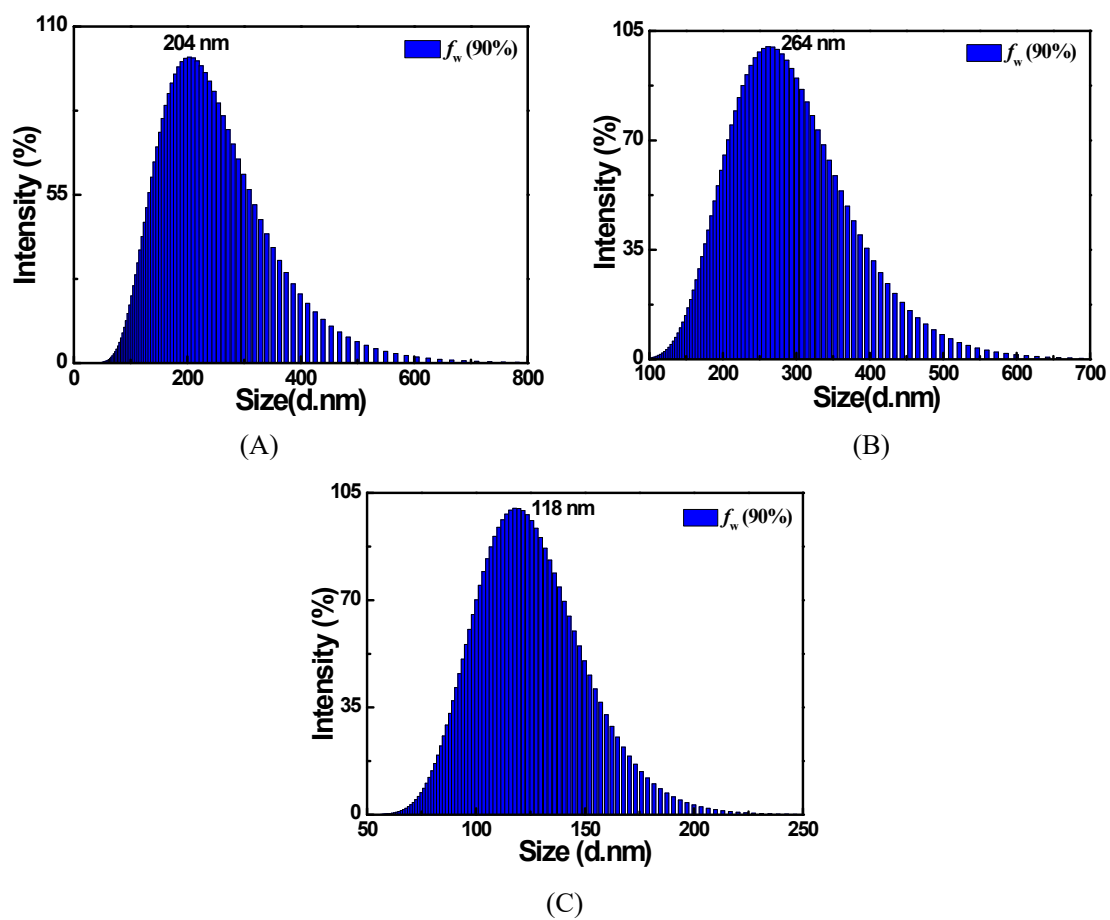

**Figure S10.** Size distribution curve of TPA-DTA-C (A), TPA-DTA-PA (B) TPA-DTA-PATF (C) in THF-H<sub>2</sub>O ( $f_w=90\%$ ) mixture.

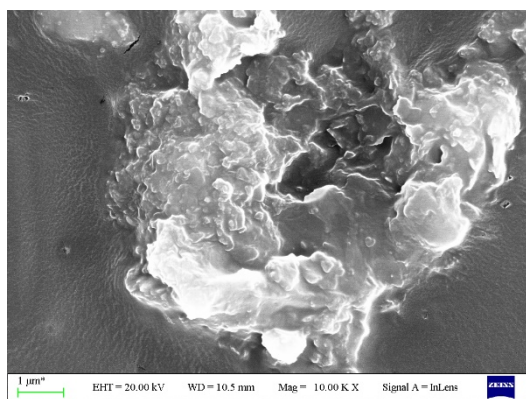

(A)

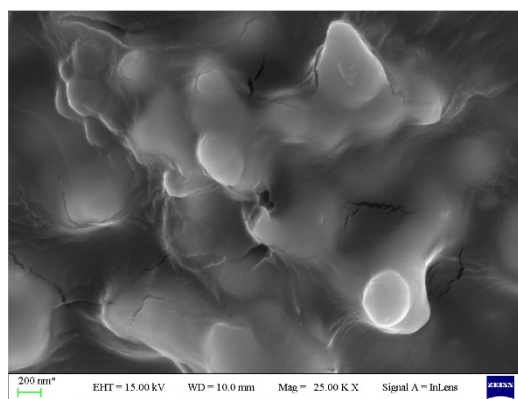

(B)

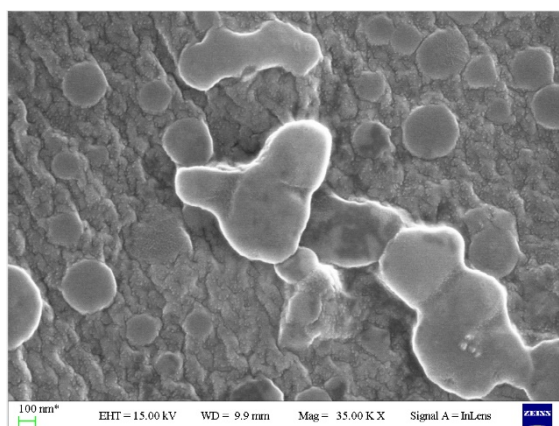

(C)

**Figure S11.** SEM images of **TPA-DTA-C** (A), **TPA-DTA-PA** (B) and **TPA-DTA-PATF** (C) in THF/H<sub>2</sub>O ( $f_w = 90\%$ )..

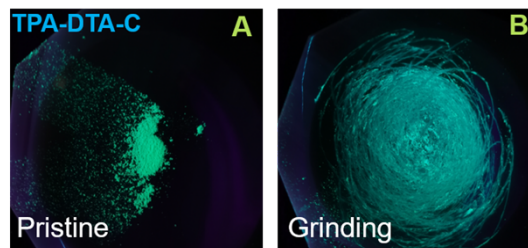

**Figure S12.** Photographic images of TPA-DTA-C in various states under 365 nm UV irradiation.

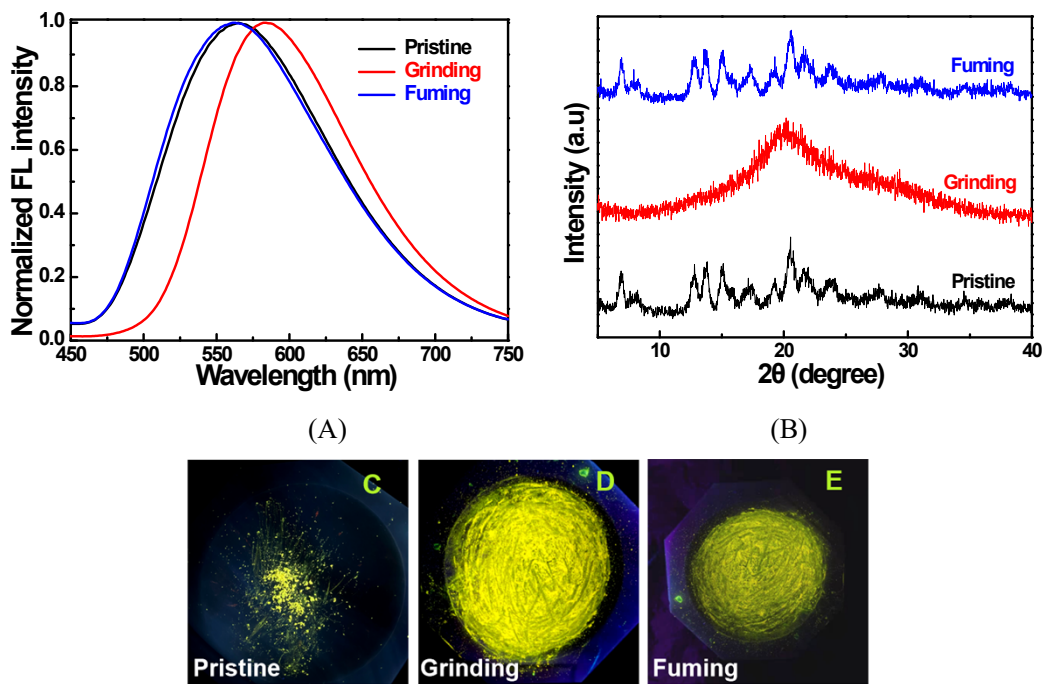

**Figure S13.** (A) Solid state PL spectra of TPA-DTA-PA before and after the grinding, and after treatment with DCM vapor. (B) XRD curves of TPA-DTA-PA in pristine, ground, and fumed form, (C-E) Photographic images of TPA-DTA-PA in various states under 365 nm UV irradiation.



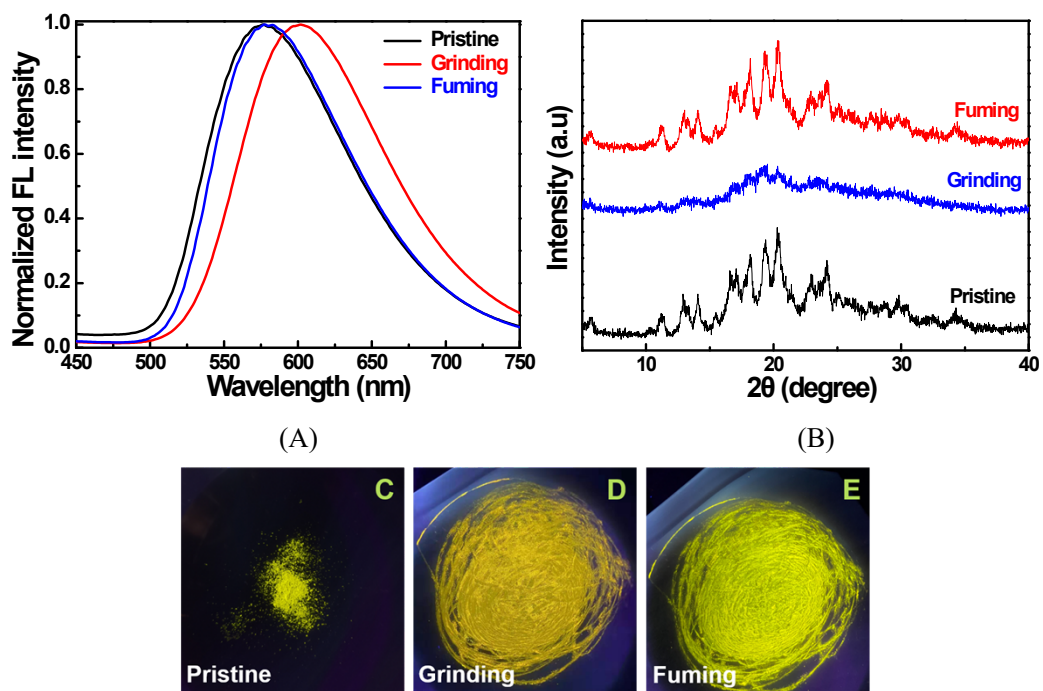

**Figure S14.** (A) Solid state PL spectra of **TPA-DTA-PATF** before and after the grinding, and after treatment with DCM vapor, (B) XRD curves of **TPA-DTA-PATF** in pristine, ground, and fumed form, (C-E) Photographic images of **TPA-DTA-PATF** in various states under 365 nm UV irradiation.

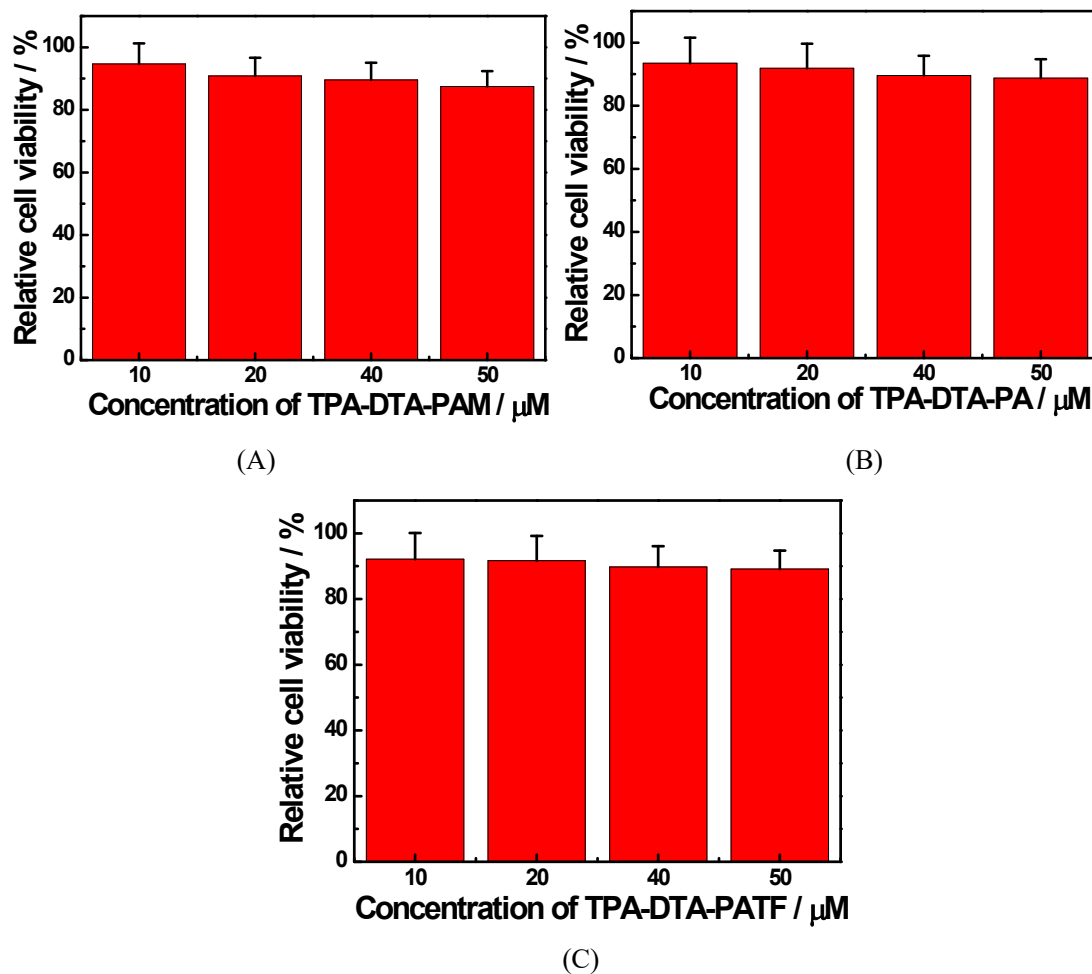

**Figure S15.** % cell viability of HeLa cells treated with different concentrations (10→50  $\mu\text{M}$ ) of

TPA-DTAs for 24 h determined by MTT assay.

**Table S1.** Symbolic Z-Matrix of TPA-DTA-C.

|   |          |          |         |
|---|----------|----------|---------|
| C | -0.883   | 0.47461  | 0       |
| C | -1.917   | 1.29261  | -0.227  |
| C | -3.171   | 1.11361  | 0.252   |
| C | -3.327   | 0.13361  | 1.186   |
| C | -2.302   | -0.74239 | 1.313   |
| C | -1.098   | -0.60639 | 0.746   |
| C | -4.211   | 1.91261  | -0.117  |
| C | -5.391   | 1.70861  | 0.526   |
| C | -5.497   | 0.84761  | 1.563   |
| C | -4.487   | -0.00039 | 1.89    |
| C | -6.548   | 2.25961  | 0.084   |
| C | -7.698   | 2.24061  | 0.768   |
| C | -7.703   | 1.64561  | 1.961   |
| C | -6.61    | 0.96461  | 2.326   |
| C | -4.152   | 2.92261  | -1.031  |
| C | -4.727   | -0.94539 | 2.844   |
| C | -4.765   | 4.11061  | -0.866  |
| C | -4.519   | 4.96261  | -1.864  |
| C | -3.675   | 4.40961  | -2.745  |
| S | -3.289   | 3.09561  | -2.212  |
| C | -3.93485 | -2.02155 | 3.04078 |
| C | -4.30998 | -2.76524 | 4.08608 |
| C | -5.36259 | -2.1788  | 4.66504 |
| S | -5.67493 | -0.92448 | 3.97597 |
| C | -3.233   | 4.95261  | -3.901  |
| C | -2.364   | 4.34161  | -4.729  |
| C | -1.96    | 4.88961  | -5.887  |
| C | -2.369   | 6.09461  | -6.343  |
| C | -3.229   | 6.69761  | -5.49   |
| C | -3.643   | 6.16061  | -4.331  |
| N | -1.985   | 6.61461  | -7.468  |
| C | -1.975   | 7.90361  | -7.618  |
| C | -1.617   | 5.84461  | -8.446  |
| C | -2.125   | 8.51261  | -8.82   |
| C | -2.122   | 9.84461  | -8.991  |
| C | -1.959   | 10.65961 | -7.943  |
| C | -1.804   | 10.10861 | -6.733  |
| C | -1.816   | 8.77361  | -6.591  |
| C | -0.742   | 6.22861  | -9.406  |
| C | -0.351   | 5.44361  | -10.423 |
| C | -0.832   | 4.19961  | -10.539 |
| C | -1.701   | 3.77161  | -9.616  |
| C | -2.071   | 4.57761  | -8.608  |

|   |          |          |         |
|---|----------|----------|---------|
| C | -5.97542 | -2.68939 | 5.77015 |
| O | -6.9384  | -2.23526 | 6.353   |
| H | 0.112    | 0.65861  | -0.442  |
| H | -1.605   | 2.13761  | -0.849  |
| H | -2.351   | -1.67339 | 1.887   |
| H | -0.293   | -1.34239 | 0.909   |
| H | -6.634   | 2.77061  | -0.888  |
| H | -8.603   | 2.74161  | 0.386   |
| H | -8.602   | 1.67461  | 2.6     |
| H | -6.702   | 0.50661  | 3.324   |
| H | -5.402   | 4.41561  | -0.021  |
| H | -4.975   | 5.96061  | -1.905  |
| H | -3.04018 | -2.29748 | 2.46301 |
| H | -3.81362 | -3.69085 | 4.40782 |
| H | -1.929   | 3.35761  | -4.48   |
| H | -1.195   | 4.30261  | -6.426  |
| H | -3.718   | 7.65261  | -5.747  |
| H | -4.376   | 6.75361  | -3.76   |
| H | -2.342   | 7.94261  | -9.739  |
| H | -2.277   | 10.27661 | -9.995  |
| H | -1.954   | 11.75461 | -8.071  |
| H | -1.646   | 10.76061 | -5.857  |
| H | -1.606   | 8.42861  | -5.564  |
| H | -0.228   | 7.20461  | -9.37   |
| H | 0.384    | 5.81061  | -11.159 |
| H | -0.521   | 3.54661  | -11.37  |
| H | -2.129   | 2.75761  | -9.704  |
| H | -2.848   | 4.14861  | -7.952  |
| H | -5.5101  | -3.63219 | 6.14763 |

---

**Table S2.** Total energies of TPA-DTA-C.

|                                             |                             |
|---------------------------------------------|-----------------------------|
| Zero-point correction                       | 0.558239 (Hartree/Particle) |
| Thermal correction to Energy                | 0.594417                    |
| Thermal correction to Enthalpy              | 0.595361                    |
| Thermal correction to Gibbs Free Energy     | 0.482156                    |
| Sum of electronic and zero-point Energies   | -2504.619982                |
| Sum of electronic and thermal Energies      | -2504.583804                |
| Sum of electronic and thermal Enthalpies    | -2504.582860                |
| Sum of electronic and thermal Free Energies | -2504.696065                |

**Table S3.** Symbolic Z-Matrix of TPA-DTA-PAM.

|   |          |          |          |
|---|----------|----------|----------|
| C | -1.22212 | -5.53657 | 0.45127  |
| C | -1.92683 | -4.38169 | 0.23902  |
| C | -1.26613 | -3.12876 | 0.02401  |
| C | 0.17894  | -3.10685 | 0.07737  |
| C | 0.87362  | -4.34056 | 0.29279  |
| C | 0.19914  | -5.5188  | 0.46727  |
| C | -1.97891 | -1.92698 | -0.21327 |
| C | 0.87311  | -1.88484 | -0.07044 |
| C | 0.16051  | -0.68191 | -0.27967 |
| C | -1.28141 | -0.70298 | -0.36703 |
| C | -1.95755 | 0.52915  | -0.6432  |
| H | -3.03674 | 0.52537  | -0.73125 |
| C | -1.26992 | 1.70452  | -0.78928 |
| C | 0.14598  | 1.72942  | -0.66756 |
| C | 0.83588  | 0.57237  | -0.42417 |
| H | -1.75142 | -6.47109 | 0.61702  |
| H | -3.01003 | -4.40196 | 0.24266  |
| H | 1.95716  | -4.32221 | 0.32534  |
| H | 0.74899  | -6.44171 | 0.63074  |
| H | -1.80872 | 2.62439  | -0.99987 |
| H | 0.68046  | 2.6695   | -0.77439 |
| H | 1.91623  | 0.58944  | -0.33415 |
| C | -3.44835 | -1.95513 | -0.32105 |
| C | -4.30797 | -2.13989 | -1.37061 |
| C | -5.63709 | -2.03296 | -0.84935 |
| H | -4.01995 | -2.31521 | -2.39778 |
| C | -5.49868 | -1.7914  | 0.48274  |
| H | -6.5654  | -2.12208 | -1.39634 |
| C | 2.35656  | -1.86519 | -0.01148 |
| C | 3.16925  | -1.74081 | 1.087    |
| C | 4.56394  | -1.76376 | 0.77637  |
| H | 2.77415  | -1.63469 | 2.09187  |
| C | 4.80487  | -1.90735 | -0.56127 |
| H | 5.3489   | -1.67683 | 1.52011  |
| S | 3.32839  | -2.01604 | -1.46593 |
| S | -4.18103 | -1.73819 | 0.82497  |
| C | 6.16231  | -1.97626 | -1.2853  |
| H | 6.19419  | -2.09154 | -2.34859 |
| C | 7.31662  | -1.89139 | -0.58036 |
| C | 8.66971  | -1.9612  | -1.31238 |
| N | 9.67715  | -2.01318 | -1.85741 |
| C | 7.27988  | -1.72538 | 0.95023  |

|   |           |          |         |
|---|-----------|----------|---------|
| C | 7.25291   | -0.44902 | 1.51296 |
| C | 7.27345   | -2.85098 | 1.77396 |
| C | 7.22021   | -0.29839 | 2.89912 |
| H | 7.25877   | 0.43819  | 0.86329 |
| C | 7.23974   | -2.70048 | 3.16055 |
| H | 7.29452   | -3.85702 | 1.3306  |
| C | 7.21326   | -1.42446 | 3.72322 |
| H | 7.19959   | 0.70762  | 3.34276 |
| H | 7.23427   | -3.58816 | 3.80976 |
| C | -6.49583  | -1.58076 | 1.63726 |
| C | -6.94889  | -2.67423 | 2.37586 |
| C | -6.94596  | -0.29684 | 1.94463 |
| C | -7.8524   | -2.48381 | 3.42115 |
| H | -6.59442  | -3.68641 | 2.13279 |
| C | -7.84899  | -0.10608 | 2.99085 |
| H | -6.58884  | 0.56511  | 1.36272 |
| C | -8.30235  | -1.19929 | 3.72901 |
| H | -8.21004  | -3.34571 | 4.00297 |
| H | -8.20341  | 0.9064   | 3.23323 |
| N | -9.25457  | -0.9989  | 4.83084 |
| C | -10.70054 | -1.04627 | 4.57041 |
| C | -11.38662 | 0.11999  | 4.23038 |
| C | -11.38668 | -2.25712 | 4.66312 |
| C | -12.75863 | 0.07543  | 3.9838  |
| H | -10.84553 | 1.07459  | 4.15812 |
| C | -12.75893 | -2.30205 | 4.41553 |
| H | -10.84607 | -3.17644 | 4.93093 |
| C | -13.44499 | -1.13602 | 4.07604 |
| H | -13.29958 | 0.99476  | 3.71639 |
| H | -13.29958 | -3.25697 | 4.4883  |
| H | -14.52677 | -1.17092 | 3.88151 |
| C | -8.76082  | -0.75115 | 6.19309 |
| C | -8.52712  | -1.82234 | 7.05589 |
| C | -8.52585  | 0.55477  | 6.6231  |
| C | -8.05919  | -1.58752 | 8.34861 |
| H | -8.71319  | -2.85174 | 6.71683 |
| C | -8.05685  | 0.78977  | 7.91585 |
| H | -8.70983  | 1.39913  | 5.94315 |
| C | -7.82363  | -0.28108 | 8.77866 |
| H | -7.87556  | -2.43175 | 9.02894 |
| H | -7.87129  | 1.81951  | 8.25448 |
| H | -7.45463  | -0.09618 | 9.79795 |
| O | 7.179     | -1.27024 | 5.14447 |
| C | 7.19454   | 0.12115  | 5.47415 |

|   |         |         |         |
|---|---------|---------|---------|
| H | 6.3418  | 0.60007 | 5.04014 |
| H | 7.16539 | 0.23607 | 6.53756 |
| H | 8.08806 | 0.56841 | 5.09143 |

---



**Table S4.** Total energies of TPA-DTA-PAM.

|                                             |                             |
|---------------------------------------------|-----------------------------|
| Zero-point correction                       | 0.693761 (Hartree/Particle) |
| Thermal correction to Energy                | 0.739369                    |
| Thermal correction to Enthalpy              | 0.740313                    |
| Thermal correction to Gibbs Free Energy     | 0.603621                    |
| Sum of electronic and zero-point Energies   | -2906.177911                |
| Sum of electronic and thermal Energies      | -2906.132303                |
| Sum of electronic and thermal Enthalpies    | -2906.131359                |
| Sum of electronic and thermal Free Energies | -2906.268051                |

**Table S5.** Symbolic Z-Matrix of TPA-DTA-PA.

|   |          |          |          |
|---|----------|----------|----------|
| C | -1.22212 | -5.53657 | 0.45127  |
| C | -1.92683 | -4.38169 | 0.23902  |
| C | -1.26613 | -3.12876 | 0.02401  |
| C | 0.17894  | -3.10685 | 0.07737  |
| C | 0.87362  | -4.34056 | 0.29279  |
| C | 0.19914  | -5.5188  | 0.46727  |
| C | -1.97891 | -1.92698 | -0.21327 |
| C | 0.87311  | -1.88484 | -0.07044 |
| C | 0.16051  | -0.68191 | -0.27967 |
| C | -1.28141 | -0.70298 | -0.36703 |
| C | -1.95755 | 0.52915  | -0.6432  |
| H | -3.03674 | 0.52537  | -0.73125 |
| C | -1.26992 | 1.70452  | -0.78928 |
| C | 0.14598  | 1.72942  | -0.66756 |
| C | 0.83588  | 0.57237  | -0.42417 |
| H | -1.75142 | -6.47109 | 0.61702  |
| H | -3.01003 | -4.40196 | 0.24266  |
| H | 1.95716  | -4.32221 | 0.32534  |
| H | 0.74899  | -6.44171 | 0.63074  |
| H | -1.80872 | 2.62439  | -0.99987 |
| H | 0.68046  | 2.6695   | -0.77439 |
| H | 1.91623  | 0.58944  | -0.33415 |
| C | -3.44835 | -1.95513 | -0.32105 |
| C | -4.30797 | -2.13989 | -1.37061 |
| C | -5.63709 | -2.03296 | -0.84935 |
| H | -4.01995 | -2.31521 | -2.39778 |
| C | -5.49868 | -1.7914  | 0.48274  |
| H | -6.5654  | -2.12208 | -1.39634 |
| C | 2.35656  | -1.86519 | -0.01148 |
| C | 3.16925  | -1.74081 | 1.087    |
| C | 4.56394  | -1.76376 | 0.77637  |
| H | 2.77415  | -1.63469 | 2.09187  |
| C | 4.80487  | -1.90735 | -0.56127 |
| H | 5.3489   | -1.67683 | 1.52011  |
| S | 3.32839  | -2.01604 | -1.46593 |
| S | -4.18103 | -1.73819 | 0.82497  |
| C | 6.16231  | -1.97626 | -1.2853  |
| H | 6.19419  | -2.09154 | -2.34859 |
| C | 7.31662  | -1.89139 | -0.58036 |
| C | 8.66971  | -1.9612  | -1.31238 |
| N | 9.67715  | -2.01318 | -1.85741 |
| C | 7.27988  | -1.72538 | 0.95023  |

|   |          |          |         |
|---|----------|----------|---------|
| C | 7.25291  | -0.44902 | 1.51296 |
| C | 7.27345  | -2.85098 | 1.77396 |
| C | 7.22021  | -0.29839 | 2.89912 |
| H | 7.25877  | 0.43819  | 0.86329 |
| C | 7.23974  | -2.70048 | 3.16055 |
| H | 7.29452  | -3.85702 | 1.3306  |
| C | 7.21326  | -1.42446 | 3.72322 |
| H | 7.19959  | 0.70762  | 3.34276 |
| H | 7.23427  | -3.58816 | 3.80976 |
| C | -6.49583 | -1.58076 | 1.63726 |
| C | -6.94889 | -2.67423 | 2.37586 |
| C | -6.94596 | -0.29684 | 1.94463 |
| C | -7.8524  | -2.48381 | 3.42115 |
| H | -6.59442 | -3.68641 | 2.13279 |
| C | -7.84899 | -0.10608 | 2.99085 |
| H | -6.58884 | 0.56511  | 1.36272 |
| C | -8.30235 | -1.19929 | 3.72901 |
| H | -8.21004 | -3.34571 | 4.00297 |
| H | -8.20341 | 0.9064   | 3.23323 |
| N | -9.25457 | -0.9989  | 4.83084 |
| C | -10.7005 | -1.0462  | 4.57041 |
| C | -11.3866 | 0.1199   | 4.23038 |
| C | -11.3866 | -2.2571  | 4.66312 |
| C | -12.7586 | 0.0754   | 3.9838  |
| H | -10.8455 | 1.0745   | 4.15812 |
| C | -12.7589 | -2.302   | 4.41553 |
| H | -10.846  | -3.1764  | 4.93093 |
| C | -13.4449 | -1.136   | 4.07604 |
| H | -13.2995 | 0.9947   | 3.71639 |
| H | -13.2995 | -3.2569  | 4.4883  |
| H | -14.5267 | -1.1709  | 3.88151 |
| C | -8.76082 | -0.75115 | 6.19309 |
| C | -8.52712 | -1.82234 | 7.05589 |
| C | -8.52585 | 0.55477  | 6.6231  |
| C | -8.05919 | -1.58752 | 8.34861 |
| H | -8.71319 | -2.85174 | 6.71683 |
| C | -8.05685 | 0.78977  | 7.91585 |
| H | -8.70983 | 1.39913  | 5.94315 |
| C | -7.82363 | -0.28108 | 8.77866 |
| H | -7.87556 | -2.43175 | 9.02894 |
| H | -7.87129 | 1.81951  | 8.25448 |
| H | -7.45463 | -0.09618 | 9.79795 |
| H | 7.18762  | -1.30907 | 4.78667 |

---

**Table S6.** Total energies of TPA-DTA-PA

---

|                                             |                             |
|---------------------------------------------|-----------------------------|
| Zero-point correction                       | 0.660927 (Hartree/Particle) |
| Thermal correction to Energy                | 0.703963                    |
| Thermal correction to Enthalpy              | 0.704907                    |
| Thermal correction to Gibbs Free Energy     | 0.573940                    |
| Sum of electronic and zero-point Energies   | -2791.686982                |
| Sum of electronic and thermal Energies      | -2791.643946                |
| Sum of electronic and thermal Enthalpies    | -2791.643001                |
| Sum of electronic and thermal Free Energies | -2791.773968                |

---

**Table S7.** Symbolic Z-Matrix of TPA-DTA-PATF.

|   |          |          |          |
|---|----------|----------|----------|
| C | -1.22212 | -5.53657 | 0.45127  |
| C | -1.92683 | -4.38169 | 0.23902  |
| C | -1.26613 | -3.12876 | 0.02401  |
| C | 0.17894  | -3.10685 | 0.07737  |
| C | 0.87362  | -4.34056 | 0.29279  |
| C | 0.19914  | -5.5188  | 0.46727  |
| C | -1.97891 | -1.92698 | -0.21327 |
| C | 0.87311  | -1.88484 | -0.07044 |
| C | 0.16051  | -0.68191 | -0.27967 |
| C | -1.28141 | -0.70298 | -0.36703 |
| C | -1.95755 | 0.52915  | -0.6432  |
| H | -3.03674 | 0.52537  | -0.73125 |
| C | -1.26992 | 1.70452  | -0.78928 |
| C | 0.14598  | 1.72942  | -0.66756 |
| C | 0.83588  | 0.57237  | -0.42417 |
| H | -1.75142 | -6.47109 | 0.61702  |
| H | -3.01003 | -4.40196 | 0.24266  |
| H | 1.95716  | -4.32221 | 0.32534  |
| H | 0.74899  | -6.44171 | 0.63074  |
| H | -1.80872 | 2.62439  | -0.99987 |
| H | 0.68046  | 2.6695   | -0.77439 |
| H | 1.91623  | 0.58944  | -0.33415 |
| C | -3.44835 | -1.95513 | -0.32105 |
| C | -4.30797 | -2.13989 | -1.37061 |
| C | -5.63709 | -2.03296 | -0.84935 |
| H | -4.01995 | -2.31521 | -2.39778 |
| C | -5.49868 | -1.7914  | 0.48274  |
| H | -6.5654  | -2.12208 | -1.39634 |
| C | 2.35656  | -1.86519 | -0.01148 |
| C | 3.16925  | -1.74081 | 1.087    |
| C | 4.56394  | -1.76376 | 0.77637  |
| H | 2.77415  | -1.63469 | 2.09187  |
| C | 4.80487  | -1.90735 | -0.56127 |
| H | 5.3489   | -1.67683 | 1.52011  |
| S | 3.32839  | -2.01604 | -1.46593 |
| S | -4.18103 | -1.73819 | 0.82497  |
| C | 6.16231  | -1.97626 | -1.2853  |
| H | 6.19419  | -2.09154 | -2.34859 |
| C | 7.31662  | -1.89139 | -0.58036 |
| C | 8.66971  | -1.9612  | -1.31238 |
| N | 9.67715  | -2.01318 | -1.85741 |
| C | 7.27988  | -1.72538 | 0.95023  |

|   |          |          |         |
|---|----------|----------|---------|
| C | 7.25291  | -0.44902 | 1.51296 |
| C | 7.27345  | -2.85098 | 1.77396 |
| C | 7.22021  | -0.29839 | 2.89912 |
| H | 7.25877  | 0.43819  | 0.86329 |
| C | 7.23974  | -2.70048 | 3.16055 |
| H | 7.29452  | -3.85702 | 1.3306  |
| C | 7.21326  | -1.42446 | 3.72322 |
| H | 7.19959  | 0.70762  | 3.34276 |
| H | 7.23427  | -3.58816 | 3.80976 |
| C | 7.17707  | -1.25779 | 5.25375 |
| F | 6.51368  | -0.12465 | 5.56745 |
| F | 8.43879  | -1.18671 | 5.72863 |
| F | 6.54701  | -2.3159  | 5.80686 |
| C | -6.49583 | -1.58076 | 1.63726 |
| C | -6.94889 | -2.67423 | 2.37586 |
| C | -6.94596 | -0.29684 | 1.94463 |
| C | -7.8524  | -2.48381 | 3.42115 |
| H | -6.59442 | -3.68641 | 2.13279 |
| C | -7.84899 | -0.10608 | 2.99085 |
| H | -6.58884 | 0.56511  | 1.36272 |
| C | -8.30235 | -1.19929 | 3.72901 |
| H | -8.21004 | -3.34571 | 4.00297 |
| H | -8.20341 | 0.9064   | 3.23323 |
| N | -9.25457 | -0.9989  | 4.83084 |
| C | -10.7005 | -1.0462  | 4.57041 |
| C | -11.3866 | 0.1199   | 4.23038 |
| C | -11.3866 | -2.2571  | 4.66312 |
| C | -12.7586 | 0.0754   | 3.9838  |
| H | -10.8455 | 1.0745   | 4.15812 |
| C | -12.7589 | -2.302   | 4.41553 |
| H | -10.846  | -3.1764  | 4.93093 |
| C | -13.4449 | -1.136   | 4.07604 |
| H | -13.2995 | 0.9947   | 3.71639 |
| H | -13.2995 | -3.2569  | 4.4883  |
| H | -14.5267 | -1.1709  | 3.88151 |
| C | -8.76082 | -0.75115 | 6.19309 |
| C | -8.52712 | -1.82234 | 7.05589 |
| C | -8.52585 | 0.55477  | 6.6231  |
| C | -8.05919 | -1.58752 | 8.34861 |
| H | -8.71319 | -2.85174 | 6.71683 |
| C | -8.05685 | 0.78977  | 7.91585 |
| H | -8.70983 | 1.39913  | 5.94315 |
| C | -7.82363 | -0.28108 | 8.77866 |
| H | -7.87556 | -2.43175 | 9.02894 |

|   |          |          |         |
|---|----------|----------|---------|
| H | -7.87129 | 1.81951  | 8.25448 |
| H | -7.45463 | -0.09618 | 9.79795 |

---

**Table S8.** Total energies of TPA-DTA-PATF.

---

|                                             |                             |
|---------------------------------------------|-----------------------------|
| Zero-point correction                       | 0.665673 (Hartree/Particle) |
| Thermal correction to Energy                | 0.712348                    |
| Thermal correction to Enthalpy              | 0.713292                    |
| Thermal correction to Gibbs Free Energy     | 0.573009                    |
| Sum of electronic and zero-point Energies   | -3128.718801                |
| Sum of electronic and thermal Energies      | -3128.672126                |
| Sum of electronic and thermal Enthalpies    | -3128.671182                |
| Sum of electronic and thermal Free Energies | -3128.811466                |

---
